# Supplementary material
Source: publisher figshare collection journal article supplement (https://acs.figshare.com/ndownloader/files/7534537)
Supplement: Supplementary file 1 [file 7534537]

## Supporting Information

**Table 1S.** Average molecular weight and a/m ratio of oil products.

**Figure 1S.** Composition of gaseous products after upgrading in SCW with 40 min and at 16:1 of water to oil ratio.

**Figure 2S.** DTG analysis of the toluene-soluble fractions obtained after the cracking in SCW.

**Figure 3S.** DSC thermograms of the (NT) non-treated, (C) centrifuged and (D) demulsified emulsions with a cooling/heating rate of 5 °C/min.

**Supporting Information: Table 1S.** Average molecular weight and a/m ratio of oil products.

| Temperature<br>(°C) | Number-average<br>molecular weight<br>(Mn) |                  |                 | Weight-average<br>molecular weight<br>(Mw) |      |      | a/m ratio of oil products        |                     |                     |
|---------------------|--------------------------------------------|------------------|-----------------|--------------------------------------------|------|------|----------------------------------|---------------------|---------------------|
|                     | As. <sup>a</sup>                           | Ma. <sup>b</sup> | TS <sup>c</sup> | As.                                        | Ma.  | TS   | Calculated<br>by Mn <sup>d</sup> | Calculated<br>by Mw | Measured<br>by SARA |
| Feed                | 1552                                       | 732              | 767             | 4760                                       | 1597 | 2297 | 0.045                            | 0.284               | 0.276               |
| 390                 | 875                                        | 470              | 506             | 4513                                       | 1076 | 1776 | 0.098                            | 0.256               | 0.255               |
| 400                 | 711                                        | 371              | 401             | 3152                                       | 679  | 1183 | 0.097                            | 0.256               | 0.259               |
| 410                 | 447                                        | 298              | 304             | 1453                                       | 495  | 611  | 0.042                            | 0.138               | 0.138               |
| 420                 | 383                                        | 281              | 284             | 976                                        | 458  | 493  | 0.030                            | 0.072               | 0.073               |
| 430                 | 315                                        | 244              | 246             | 731                                        | 386  | 405  | 0.029                            | 0.058               | 0.058               |
| 440                 | 320                                        | 236              | 239             | 704                                        | 373  | 382  | 0.037                            | 0.028               | 0.034               |
| 450                 | 328                                        | 213              | 214             | 682                                        | 338  | 353  | 0.009                            | 0.046               | 0.029               |

<sup>a</sup> As. means asphaltene;<sup>b</sup> Ma. means maltene;<sup>c</sup> TS means toluene-soluble products, referring to as oil products;<sup>d</sup> a/m ratio is calculated as:  $a/m \text{ ratio} = \frac{(\text{Mn of TS} - \text{Mn of Ma.})}{(\text{Mn of As.} - \text{Mn of TS})}$ .

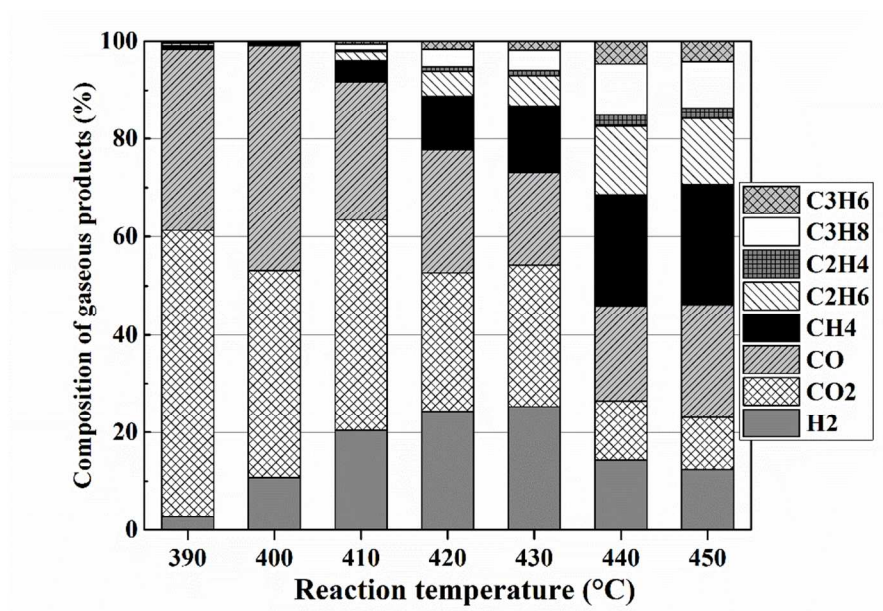

**Supporting Information: Figure 1S.** Composition of gaseous products after upgrading in SCW with 40 min and at 16:1 of water to oil ratio.

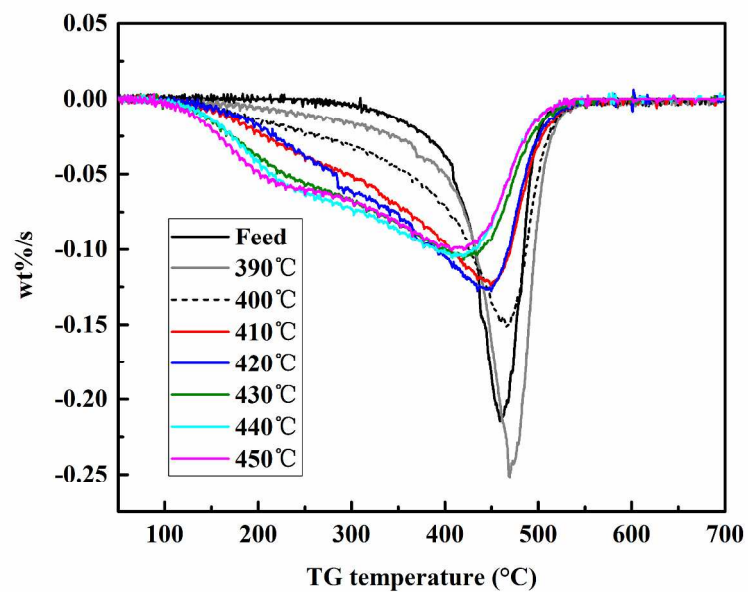

**Supporting Information: Figure 2S.** DTG analysis of the toluene-soluble fractions obtained after the cracking in SCW.

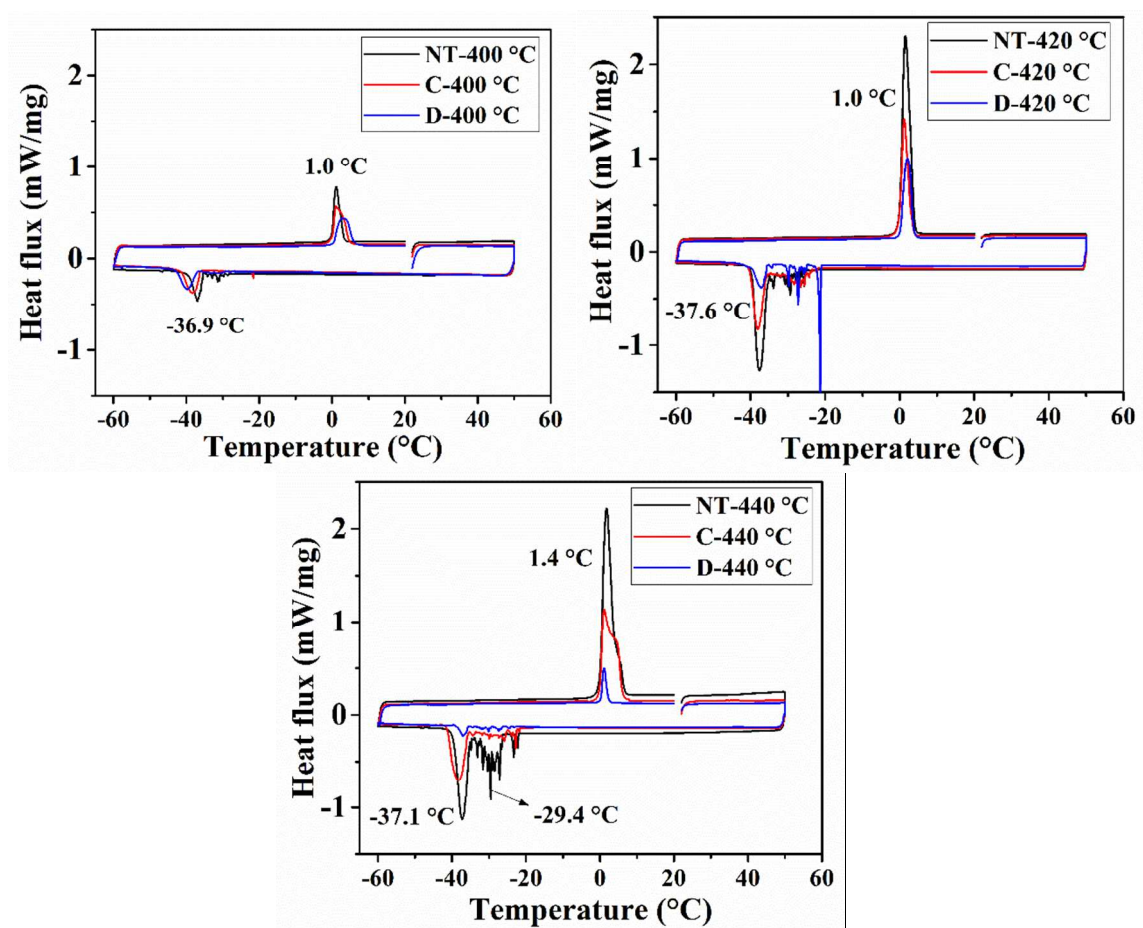

**Supporting Information: Figure 3S.** DSC thermograms of the (NT) non-treated, (C) centrifuged and (D) demulsified emulsions with a cooling/heating rate of 5 °C/min.
